# Supplementary material
Source: publisher figshare collection journal article supplement (https://sage.figshare.com/ndownloader/files/14676596)
Supplement: Supplementary file 1 [file 14676596]

Appendix A

Screenshot of stimuli: Penn and Teller video posted on Facebook by *Health in America*.

Note: The above stimuli (with active video) was consistent for all participants. The comment section (or lack thereof) was manipulated to create the four condition (Civil, Uncivil, Metacommunicative, and Control).

Appendix B

Table 2.

Nonsignificant hypothesized direct and indirect effects.

| Path | 1000 Bootstrap Resamples | | |
| --- | --- | --- | --- |
| B (SE) | LLCI | ULCI |
| Direct Effects | | | |
| Civil Discussion > Credibility | .015(.133) | –.170 | .362 |
| Uncivil Discursion > Credibility | .156(.175) | –.214 | .591 |
| Metacommunicative Discursion > Credibility | –.045(.160) | –.290 | .314 |
| Elaboration > Attitude | .128(.087) | –.089 | .336 |
| Indirect Effects | | | |
| Civil Discussion > Credibility > Elaboration > Attitudes | .001(.013) | –.034 | .029 |
| Uncivil Discussion > Credibility > Elaboration | .013(.019) | –.009 | .063 |
| > Attitudes | | | |
| Metacommunicative Discussion > Credibility | –.004(.018) | –.058 | .029 |
| > Elaboration > Attitudes | | | |
| Civil Discussion > Credibility > Elaboration > Attitudes | .001(.008) | –.020 | .016 |
| Uncivil Discussion > Credibility > Elaboration > Attitudes | .008(.012) | –.005 | .046 |
| Metacommunicative Discussion > Credibility | –.002(.011) | –.042 | .016 |
| > Elaboration > Attitudes | | | |

Note: All estimates generated from 1000 bootstrapped resamples.

*Indicates that the confidence interval does not contain zero.
